# Supplementary material
Source: Royal Society of Chemistry journal article supplement (doi:10.1039/d6cc01676f)
Supplement: d6cc01676f1.pdf [file d6cc01676f1.pdf]

*Supplementary Information for*

**Guiding Activity of Electrochemical Oxygen Evolution Reaction on  
Copper Oxide**

Jiansen Wang<sup>1,§</sup>, Jibiao Wang<sup>1,§</sup>, Mengyuan Li<sup>2</sup>, Houyu Zhu<sup>3</sup>, Yuanxing Wang<sup>1,\*</sup>

<sup>1</sup>State Key Laboratory of Green Papermaking and Resource Recycling, China-UK Low Carbon College, Shanghai Jiao Tong University, Shanghai 200240, China

<sup>2</sup>Guangzhou Customs District Technology Center, Guangzhou, Guangdong 510623, China

<sup>3</sup>Shandong Key Laboratory of Intelligent Energy Materials, School of Materials Science and Engineering, China University of Petroleum (East China), Qingdao, Shandong 266580, China

\*Author to whom correspondence should be addressed: [ywang19@alumni.nd.edu](mailto:ywang19@alumni.nd.edu).

## Computational details

All spin-polarized density functional theory (DFT) calculations were performed using the Vienna ab initio Simulation Package (VASP)<sup>1,2</sup> with the GGA-PBE exchange-correlation functional.<sup>3</sup> Projected augmented wave (PAW)<sup>4,5</sup> pseudopotentials were employed to model the ion cores, and a plane-wave cutoff energy of 500 eV was used. Periodic slab models were constructed to simulate the CuO(111) and Co<sub>3</sub>O<sub>4</sub>(111) surfaces. A vacuum region of 15 Å was introduced in the *z*-direction to minimize unwanted interactions between periodic cells. The dipole corrections were applied along the *z*-direction. Grimme's D3 method was adopted to consider the van der Waals (vdW) interactions.<sup>6</sup> The Hubbard + *U* approach was employed to alleviate the delocalization error of the GGA functional for treating transition metal atoms.<sup>7</sup> The values of  $U_{\text{eff}}$  have been set to around 3.3 and 7.0 eV for Co and Cu, respectively.<sup>8</sup>

The adsorption energies ( $E_{\text{ads}}$ ) of adsorbate on the catalyst surface, such as \*OH, \*O, and \*OOH, were calculated as:<sup>9</sup>

$$E_{\text{ads}} = E_{\text{total}} - E_{*} - E_{\text{adsorbate}} \quad (1)$$

where  $E_{\text{total}}$ ,  $E_{*}$ , and  $E_{\text{adsorbate}}$  represent the total energy of the adsorption system, catalyst surface, and adsorbate, respectively.

The change of Gibbs free energy ( $\Delta G$ ) was calculated based on the computational hydrogen electrode (CHE) model at 298.15 K:<sup>9</sup>

$$\Delta G = \Delta E_{\text{DFT}} + \Delta ZPE - T\Delta S \quad (2)$$

where  $\Delta E_{\text{DFT}}$  is the adsorption electronic energy, while  $\Delta ZPE$  and  $T\Delta S$  represent zero-point energy correction and entropy contribution. The data were post-processed using the VASPKIT tool.<sup>10</sup>

## Experimental procedures

### 1. Chemicals

All reagents were used directly without further purification. Copper mesh (99.9%, 100 mesh), cobalt oxide ( $\text{Co}_3\text{O}_4$ , 99.5%, 50 nm), and potassium hydroxide (KOH, >99.99%) were purchased from Shanghai Aladdin Biochemical Technology Co., Ltd. Hydrochloric acid (HCl, AR, 36~38%) was purchased from Sinopharm Chemical Reagent Co., Ltd. Nafion solution (5 wt%) was obtained from J&K Scientific Ltd. The  $1.0 \text{ mol L}^{-1}$  HCl solution and  $1.0 \text{ mol L}^{-1}$  KOH electrolyte were prepared using deionized water.

### 2. Synthesis of $\text{CuO}_x$ NWs

Copper mesh was cut into rectangular pieces ( $0.5 \text{ cm} \times 2.5 \text{ cm}$ ), ultrasonically cleaned in  $1.0 \text{ mol L}^{-1}$  HCl solution for 1 min to remove surface impurities and oxides, rinsed repeatedly with deionized water (3~4 times), and dried under an Ar stream. The dried mesh was immediately transferred to a muffle furnace and annealed at  $600 \text{ }^\circ\text{C}$  in air for 4 h to obtain  $\text{CuO}_x$  NWs.<sup>11</sup>

### 3. Preparation of $\text{Co}_3\text{O}_4$ Catalyst

Approximately 10 mg of  $\text{Co}_3\text{O}_4$  was dispersed in 2 mL of a mixed solution of isopropanol and deionized water (3:1 by volume). After 1 h of ultrasonication, 60  $\mu\text{L}$  of 5 wt% Nafion was added, followed by another hour of ultrasonication to form a mixture. Drop 15.7  $\mu\text{L}$  of the mixture on a 5 mm glassy carbon electrode and dry at room temperature. The catalyst loading was  $0.4 \text{ mg cm}^{-2}$ .<sup>12</sup>

### 4. Materials characterization

SEM measurements were performed using a field emission scanning electron microscope (JEOL JSM-7800F) at 0.01~30 kV. XRD patterns were collected using a Rigaku Smartlab SE X-ray diffractometer with a Cu  $\text{K}\alpha$  source ( $\lambda = 1.5406 \text{ \AA}$ ). XPS

analysis was conducted on a Shimadzu AXIS SUPRA+ X-ray photoelectron spectrometer. All XPS spectra were calibrated to the C 1s peak (284.8 eV).

## 5. Electrochemical measurements

Electrochemical tests were carried out on a Biologic workstation using a standard three-electrode system with a 1.0 mol L<sup>-1</sup> KOH electrolyte (pH = 14) at room temperature. The as-prepared catalyst electrode, a platinum sheet, and a Hg/HgO electrode (filled with 1.0 mol L<sup>-1</sup> KOH) served as the working electrode, counter electrode, and reference electrode, respectively. All potentials were converted to the reversible hydrogen electrode (RHE) using Equation (3):

$$E(\text{vs. RHE}) = E(\text{vs. Hg/HgO}) + 0.098 \text{ V} + 0.0591 \text{ V} \times \text{pH} \quad (3)$$

Linear sweep voltammetry (LSV) was performed at a scan rate of 5 mV s<sup>-1</sup>. Electrochemical double layer capacitance (Cdl) was determined by measuring cyclic voltammetry (CV) in the non-Faradaic interval (1.13~1.23 V vs. RHE) at scan rates of 20~100 mV s<sup>-1</sup>. The current density was plotted against the scan rate of the CVs.<sup>13</sup> Tafel plots were generated via the steady-state approximation method: overpotential ( $\eta$ ) was plotted against  $\log j$ , and the reaction kinetics was determined by the Tafel slope.<sup>14</sup>

**Table S1.** Calculated total energies ( $E_{\text{DFT}}$ ), zero-point energy ( $ZPE$ ) corrections, and entropic contributions ( $T^*S$ ) to the Gibbs free energies ( $G$ ) for OER catalyzed by CuO(111). All values are in eV units.

| Species          | *OH     | *O      | *OOH    |
|------------------|---------|---------|---------|
| $E_{\text{DFT}}$ | -524.17 | -518.05 | -527.71 |
| $ZPE$            | 0.38    | 0.06    | 0.44    |
| $T^*S$           | 0.06    | 0.06    | 0.11    |
| $G$              | -523.85 | -518.05 | -527.38 |

**Table S2.** Calculated total energies ( $E_{\text{DFT}}$ ), zero-point energy ( $ZPE$ ) corrections, and entropic contributions ( $T^*S$ ) to the Gibbs free energies ( $G$ ) for OER catalyzed by Co<sub>3</sub>O<sub>4</sub>(111). All values are in eV units.

| Species          | *OH     | *O      | *OOH    |
|------------------|---------|---------|---------|
| $E_{\text{DFT}}$ | -680.06 | -675.07 | -683.81 |
| $ZPE$            | 0.34    | 0.05    | 0.45    |
| $T^*S$           | 0.12    | 0.03    | 0.15    |
| $G$              | -679.84 | -675.06 | -683.51 |

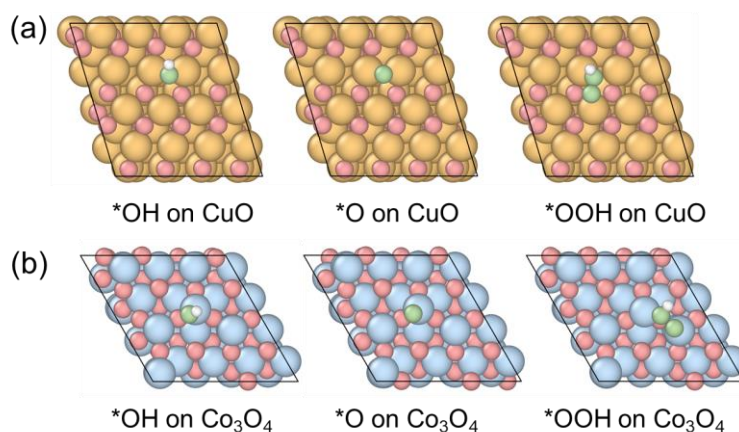

**Figure S1.** Top view of intermediate geometries for the OER catalyzed by (a) CuO(111) and (b) Co<sub>3</sub>O<sub>4</sub>(111). (Cu: yellow, Co: blue, O in catalyst: pink, O in intermediate: green, H: white)

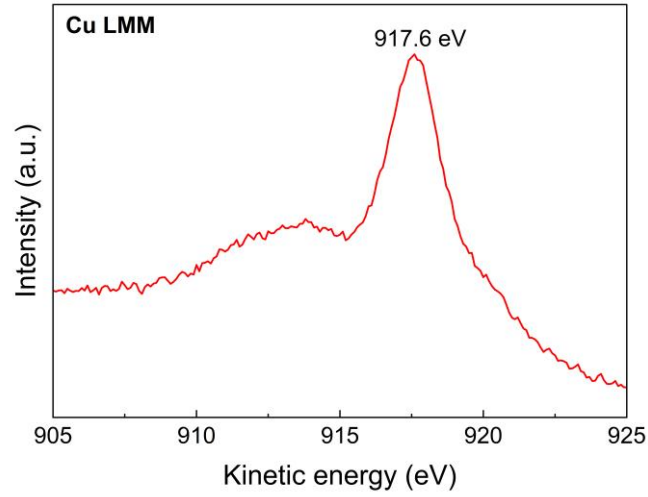

**Figure S2.** Cu LMM photoelectron spectrum of the  $\text{CuO}_x$  NWs.

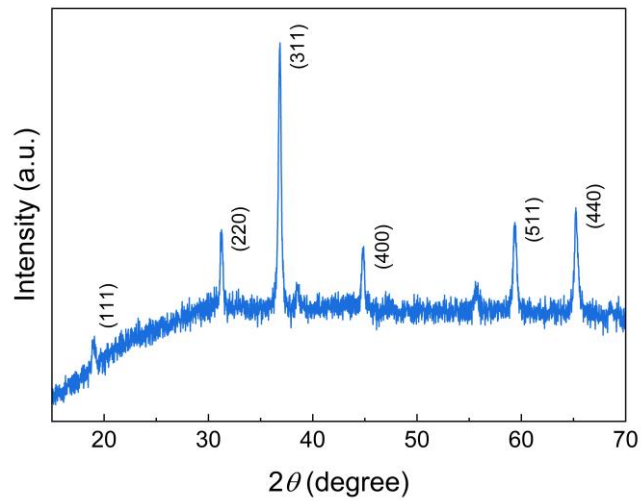

**Figure S3.** XRD pattern of the commercial  $\text{Co}_3\text{O}_4$  NPs.

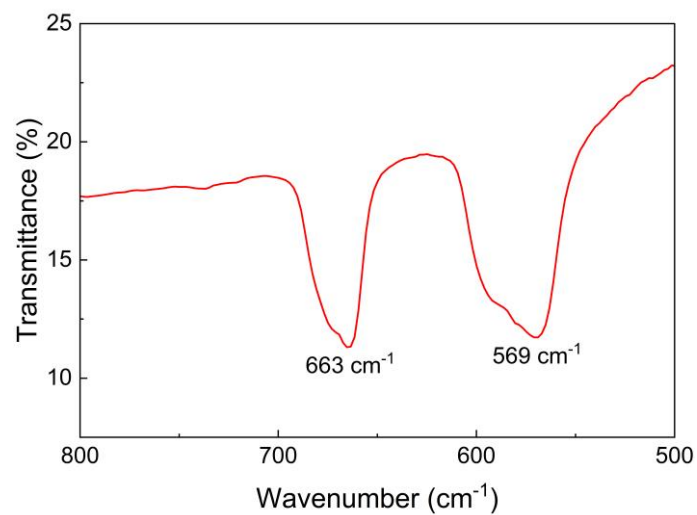

**Figure S4.** FT-IR spectrum of the commercial Co<sub>3</sub>O<sub>4</sub> NPs.

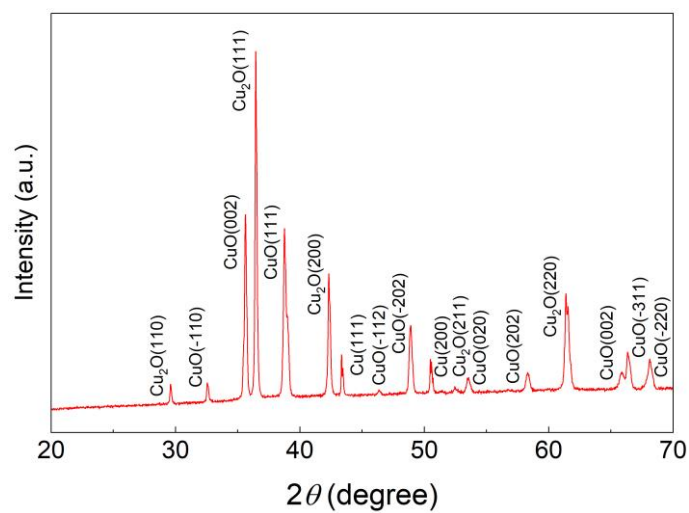

**Figure S5.** XRD pattern of the CuO<sub>x</sub> NWs after the OER.

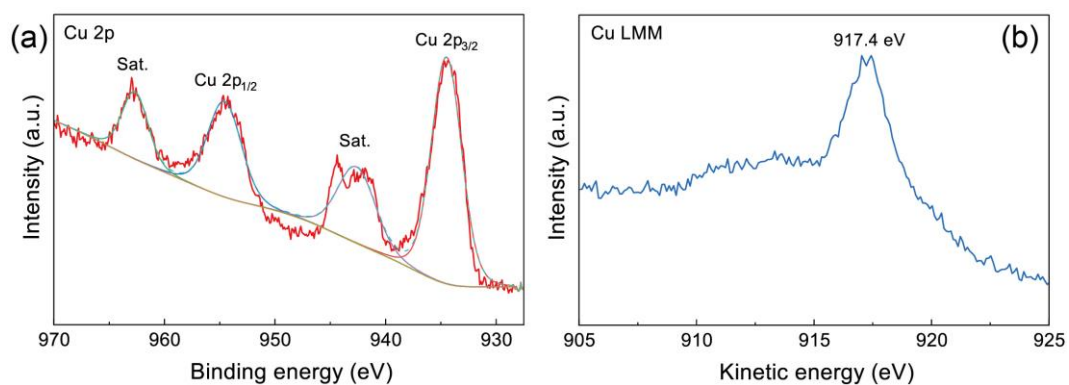

**Figure S6.** Cu 2p (a) and Cu LMM (b) photoelectron spectrum of the CuO<sub>x</sub> NWs after the OER.

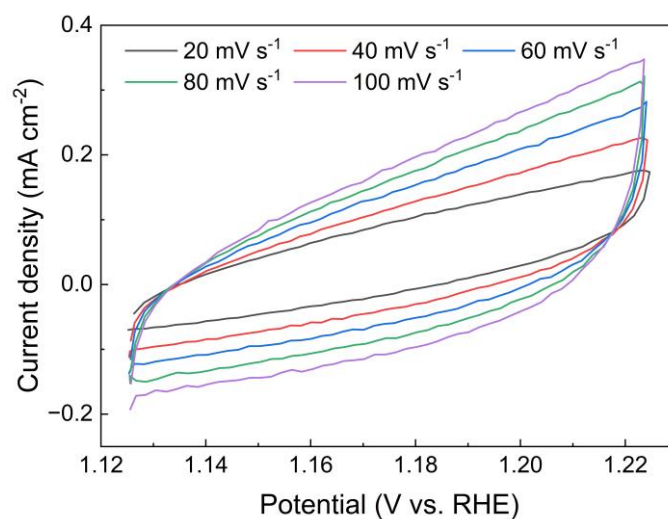

**Figure S7.** CVs taken on the CuO<sub>x</sub> NWs over a range of scan rates in a potential window where double-layer charging and discharging are relevant.

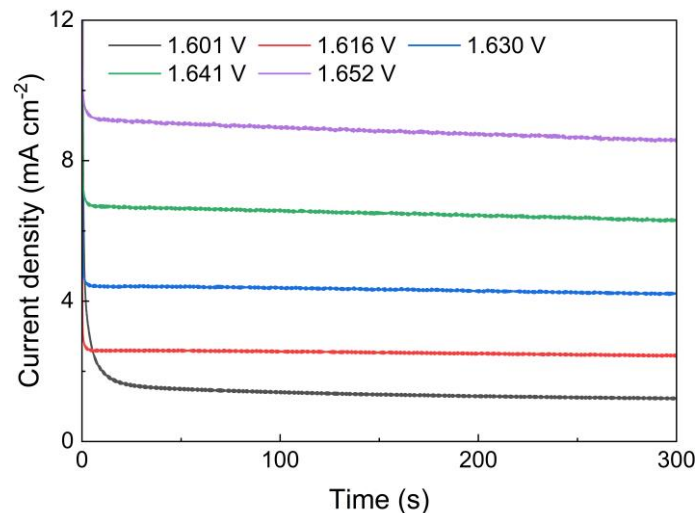

**Figure S8.** Steady-state electrochemical  $j$ - $t$  plots of oxygen evolution on the  $\text{CuO}_x$  NWs for Tafel analysis.

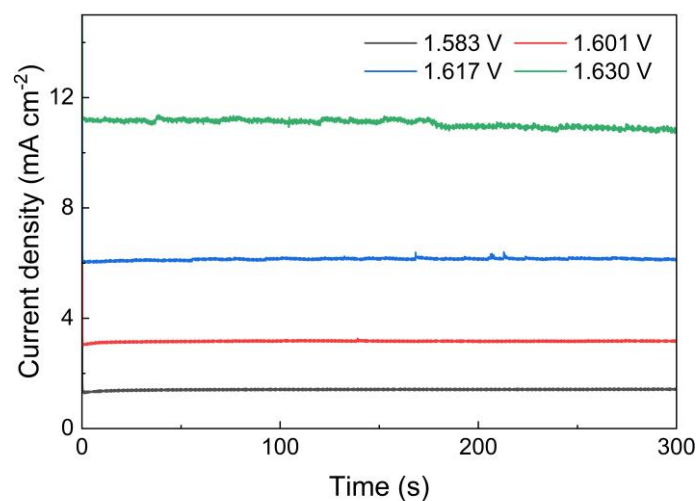

**Figure S9.** Steady-state electrochemical  $j$ - $t$  plots of oxygen evolution on the  $\text{Co}_3\text{O}_4$  NPs for Tafel analysis.

## References

- (1) Kresse, G.; Furthmüller, J. Efficiency of ab-initio total energy calculations for metals and semiconductors using a plane-wave basis set. *Comput. Mater. Sci.* **1996**, *6*, 15-50.
- (2) Kresse, G.; Furthmüller, J. Efficient iterative schemes for ab initio total-energy calculations using a plane-wave basis set. *Phys. Rev. B* **1996**, *54*, 11169-11186.
- (3) Perdew, J. P.; Burke, K.; Ernzerhof, M. Generalized Gradient Approximation Made Simple. *Phys. Rev. Lett.* **1996**, *77*, 3865-3868.
- (4) Blöchl, P. E. Projector augmented-wave method. *Phys. Rev. B* **1994**, *50*, 17953-

17979.

(5) Kresse, G.; Joubert, D. From ultrasoft pseudopotentials to the projector augmented-wave method. *Phys. Rev. B* **1999**, *59*, 1758-1775.

(6) Grimme, S. Semiempirical GGA-type density functional constructed with a long-range dispersion correction. *J. Comput. Chem.* **2006**, *27*, 1787-1799.

(7) Dudarev, S. L.; Botton, G. A.; Savrasov, S. Y.; Humphreys, C. J.; Sutton, A. P. Electron-energy-loss spectra and the structural stability of nickel oxide: An LSDA+U study. *Phys. Rev. B* **1998**, *57*, 1505-1509.

(8) Niu, W.; Shi, J.; Ju, L.; Li, Z.; Orlovskaya, N.; Liu, Y.; Yang, Y. Understanding Synergism of Cobalt Metal and Copper Oxide toward Highly Efficient Electrocatalytic Oxygen Evolution. *ACS Catal.* **2018**, *8*, 12030-12040.

(9) Nørskov, J. K.; Bligaard, T.; Logadottir, A.; Kitchin, J. R.; Chen, J. G.; Pandelov, S.; Stimming, U. Trends in the Exchange Current for Hydrogen Evolution. *J. Electrochem. Soc.* **2005**, *152*, J23.

(10) Wang, V.; Xu, N.; Liu, J.-C.; Tang, G.; Geng, W.-T. VASPKIT: A user-friendly interface facilitating high-throughput computing and analysis using VASP code. *Comput. Phys. Commun.* **2021**, *267*, 108033.

(11) Wang, Y.; Niu, C.; Zhu, Y.; He, D.; Huang, W. Tunable Syngas Formation from Electrochemical CO<sub>2</sub> Reduction on Copper Nanowire Arrays. *ACS Appl. Energy Mater.* **2020**, *3*, 9841-9847.

(12) Zhang, R.; Pan, L.; Guo, B.; Huang, Z.-F.; Chen, Z.; Wang, L.; Zhang, X.; Guo, Z.; Xu, W.; Loh, K. P.; Zou, J.-J. Tracking the Role of Defect Types in Co<sub>3</sub>O<sub>4</sub> Structural Evolution and Active Motifs during Oxygen Evolution Reaction. *J. Am. Chem. Soc.* **2023**, *145*, 2271-2281.

(13) Li, C. W.; Kanan, M. W. CO<sub>2</sub> Reduction at Low Overpotential on Cu Electrodes Resulting from the Reduction of Thick Cu<sub>2</sub>O Films. *J. Am. Chem. Soc.* **2012**, *134*, 7231-7234.

(14) Anantharaj, S.; Noda, S.; Driess, M.; Menezes, P. W. The Pitfalls of Using Potentiodynamic Polarization Curves for Tafel Analysis in Electrocatalytic Water Splitting. *ACS Energy Lett.* **2021**, *6*, 1607-1611.
